# Supplementary material for: Solvent-free hydroamination of phenylacetylene by plasmonic gold nanoparticles coupled with a TiO2 2D photonic layer on nanotube arrays
Source: Royal Society of Chemistry journal article supplement (doi:10.1039/d0nj04132g), 2020-01-01
Supplement: d0nj04132g1.pdf [file d0nj04132g1.pdf]

## Supplementary Information

### **Solvent-free hydroamination of phenylacetylene by plasmonic gold nanoparticles coupled with TiO<sub>2</sub> 2D photonic layer on nanotube array**

**Jie Meng,<sup>a</sup> Yunheng Xiao,<sup>a</sup> Yiming Huang,<sup>b</sup> Xuguang Liu<sup>a</sup> and Jian Zhao<sup>\*a</sup>**

<sup>a</sup> Tianjin Key Laboratory of Organic Solar Cells and Photochemical Conversion, School of Chemistry and Chemical Engineering, Tianjin University of Technology, Tianjin 300384, China.

<sup>b</sup> State Key Laboratory of the Pulp and Paper Engineering, School of Light Industry and Engineering, South China University of Technology, Guangzhou 510641, China

Corresponding Author

E-mail: [zjtjbd@hotmail.com](mailto:zjtjbd@hotmail.com); [zjtjbd@email.tjut.edu.cn](mailto:zjtjbd@email.tjut.edu.cn)

Reactor device (a) and experiment setup (b).

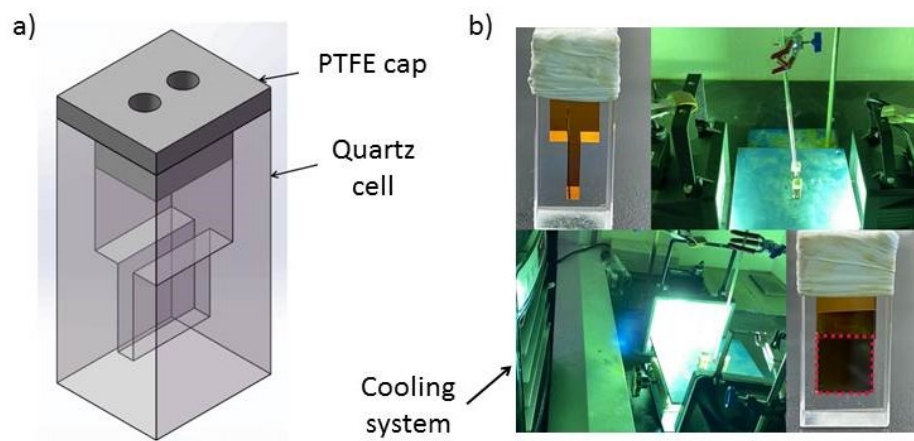

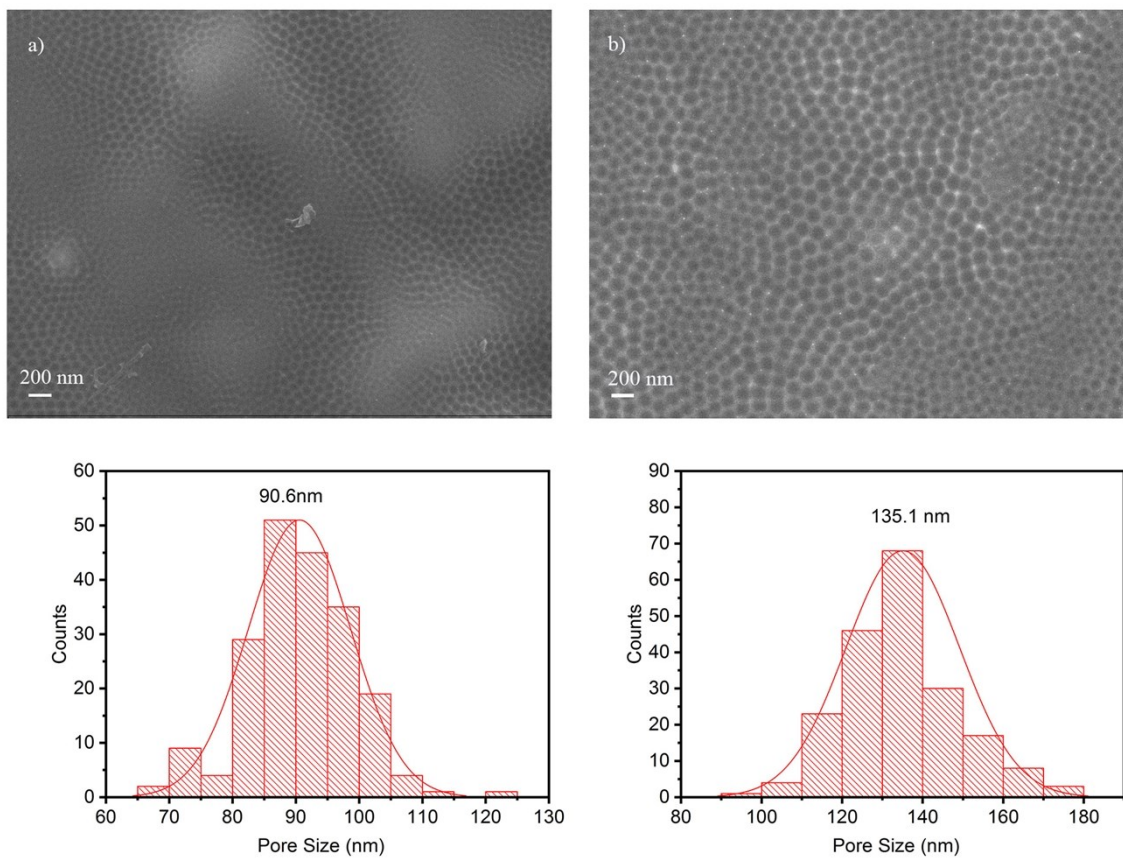

**Fig. S1** SEM images of nano-imprints after removing TiO<sub>2</sub> NTs formed at a) 30 V and b) 50 V in first-step anodization.

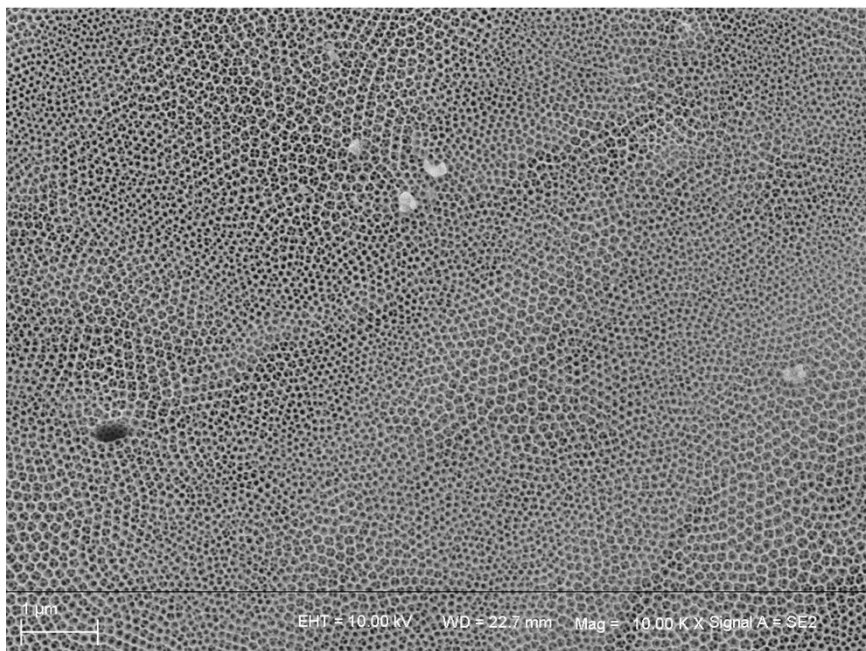

**Fig. S2** An example of SEM image in large scale for TiO<sub>2</sub> PCNTs.

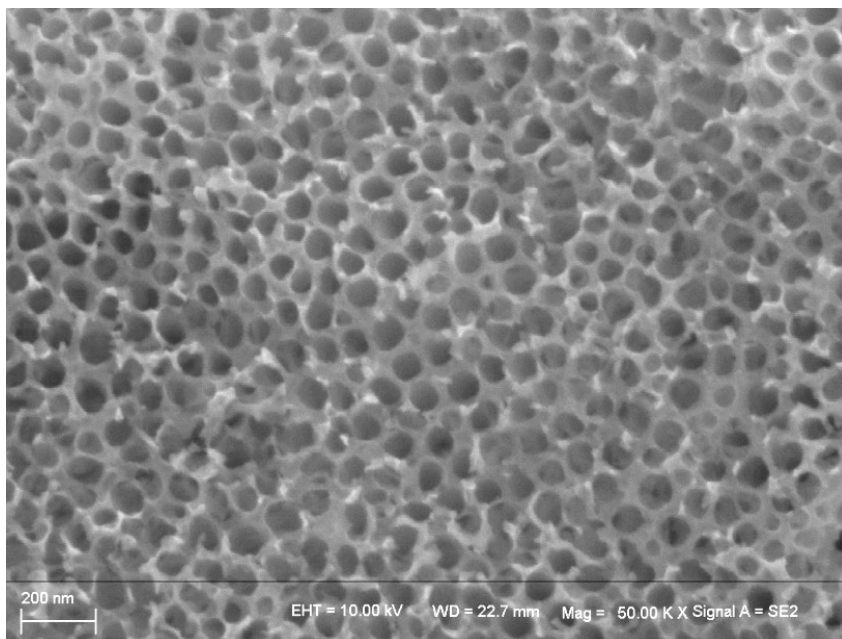

**Fig. S3** SEM image of TiO<sub>2</sub> NTs formed with applied potential 50 V for 1 h.

**Table. S1** The summary of XRD analysis for TiO<sub>2</sub> NTs, TiO<sub>2</sub> PCNTs, Au/TiO<sub>2</sub> NTs and Au/TiO<sub>2</sub> PCNTs.

| Catalyst                  | Intensity ratio of<br>(004)/(101) | Peak area of<br>(004)/(101) | Peak area ratio of<br>(004)/(101) |
|---------------------------|-----------------------------------|-----------------------------|-----------------------------------|
| TiO <sub>2</sub> NTs      | 1.08                              | 137474/79002                | 1.74                              |
| TiO <sub>2</sub> PCNTs    | 1.32                              | 254258/88178                | 2.88                              |
| Au/TiO <sub>2</sub> NTs   | 1.03                              | 129785/81012                | 1.60                              |
| Au/TiO <sub>2</sub> PCNTs | 1.17                              | 228440/87248                | 2.62                              |

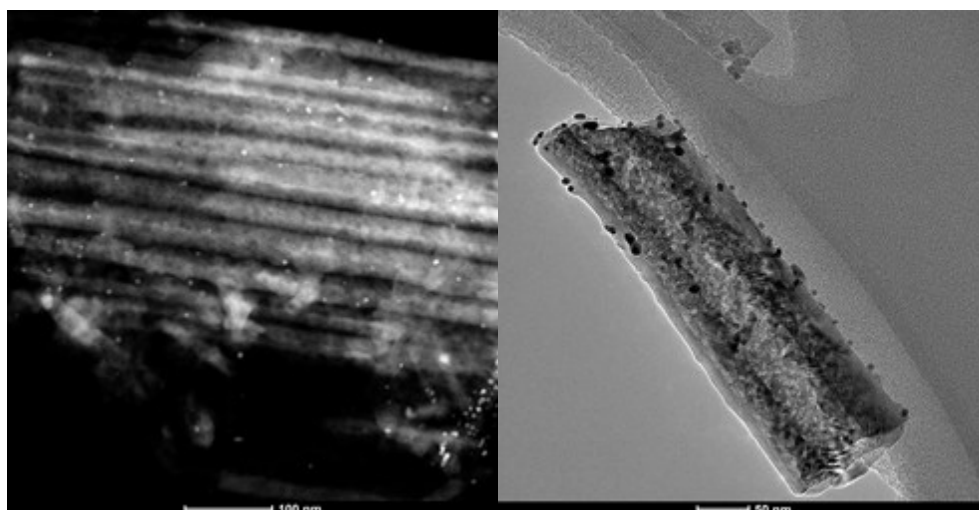

**Fig. S4** TEM images of Au/TiO<sub>2</sub> PCNTs.

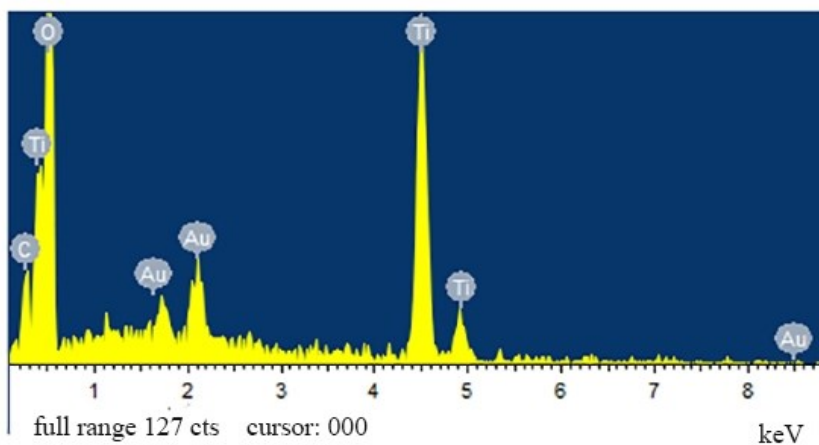

| Element | Weight percent | Atom percent |
|---------|----------------|--------------|
| C K     | 3.03           | 6.49         |
| O K     | 39.99          | 64.18        |
| Ti K    | 53.99          | 28.94        |
| Au M    | 2.99           | 0.39         |
| Total   | 100.00         |              |

**Fig. S5** SEM-EDS mapping of Au atom percent analyzed from top view.



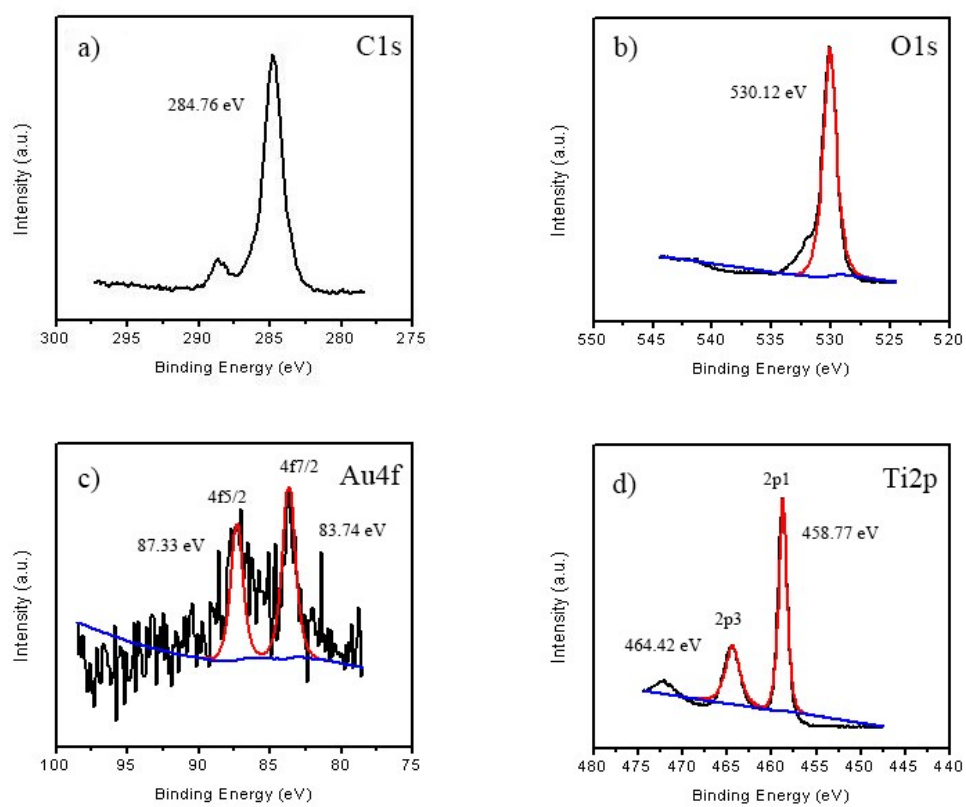

**Fig. S6** XPS of a) C1s, b) O1s, c) Au4f and d) Ti2p for Au/TiO<sub>2</sub> PCNTs scratched off from Ti foil surface.

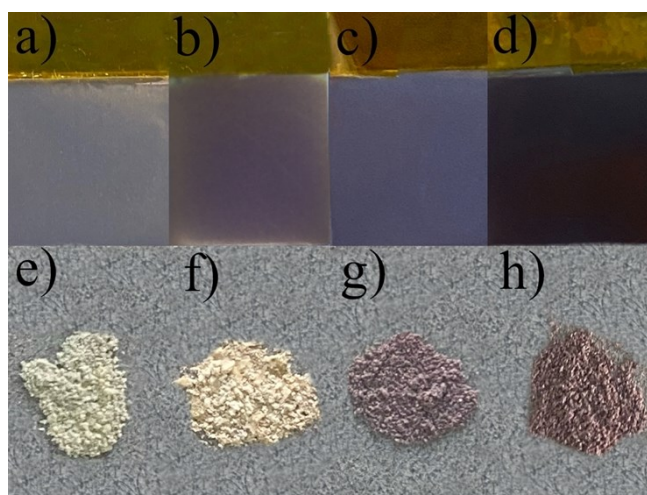

**Fig. S7** Digital photograph of the prepared samples and scratched powder from Ti foil. a, e)  $\text{TiO}_2$  NTs; b, f)  $\text{TiO}_2$  PCNTs; c, g) Au/ $\text{TiO}_2$  NTs; d, h) Au/ $\text{TiO}_2$  PCNTs.

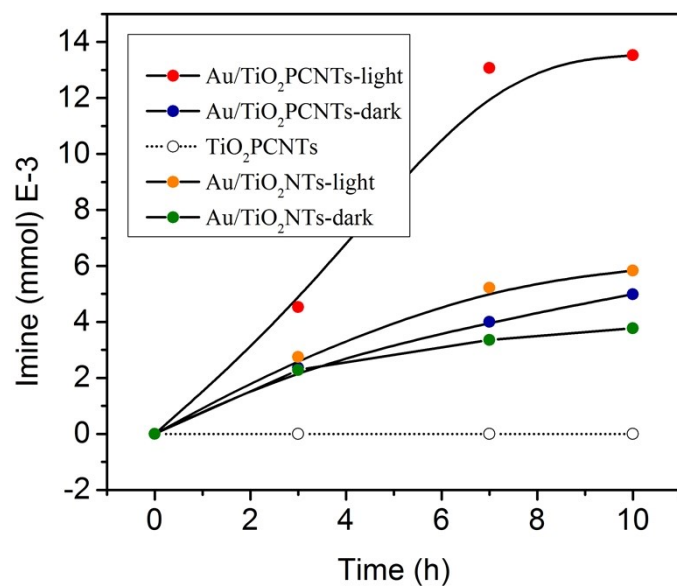

**Fig. S8** Imine product yields for hydroamination of phenylacetylene with aniline.

**Table. S2** The summary of Au content in Au/TiO<sub>2</sub> NTs and Au/TiO<sub>2</sub> PCNTs tested by ICP.

| Samples                   | Entry | Raw data ( $\mu\text{g}$ )<br>per slice | Average value ( $\mu\text{g}$ )<br>per slice | Content (mmol)<br>per slice |
|---------------------------|-------|-----------------------------------------|----------------------------------------------|-----------------------------|
| Au/TiO <sub>2</sub> NTs   | 1     | 1.960                                   | 5.059                                        | $2.568 \times 10^{-5}$      |
|                           | 2     | 4.257                                   |                                              |                             |
|                           | 3     | 8.961                                   |                                              |                             |
| Au/TiO <sub>2</sub> PCNTs | 1     | 7.296                                   | 8.737                                        | $4.435 \times 10^{-5}$      |
|                           | 2     | 8.261                                   |                                              |                             |
|                           | 3     | 10.654                                  |                                              |                             |

**Table. S3** The comparison of activity for hydroamination of phenylacetylene with aniline over different catalysts.

| Catalyst                                                               | Reaction condition   | Yield (mmol)          | TON <sup>a</sup> | TOF (h <sup>-1</sup> ) | Ref       |
|------------------------------------------------------------------------|----------------------|-----------------------|------------------|------------------------|-----------|
| Au/TiO <sub>2</sub> PCNTs                                              | visible light, 55 °C | 13.1×10 <sup>-3</sup> | 294.8            | 42.1                   | This work |
| Au <sub>n</sub> -SiO <sub>2</sub> @ICRM                                | Room temperature     | 0.215                 | 43               | 1.79                   | 1         |
| Au/TiO <sub>2</sub> +H <sub>3</sub> PO <sub>4</sub> ·12WO <sub>3</sub> | 80 °C                | 0.92                  | 460              | 38.3                   | 2         |
| Au/C                                                                   | 100 °C               | 0.5~0.7               | 24~35            | 1~1.5                  | 3         |
| Au/TiO <sub>2</sub> (B).N                                              | visible light, 40 °C | 0.4                   | 104              | 4.16                   | 4         |
| Au-Ch(I)SiO <sub>2</sub>                                               | 100 °C               | 0.92                  | 83.6             | 3.8                    | 5         |
| AuCo/ZrO <sub>2</sub>                                                  | visible light, 80 °C | 0.95                  | 187.2            | 7.8                    | 6         |

<sup>a</sup> TON is calculated on the mole of Au content.

[1] L. C. Lee and Y. Zhao, *ACS Catal.*, 2014, 4, 688-691.

[2] S. Z. Liang, L. Hammond, B. Xu, G. B. Hammond and B. Geral, *Adv. Syn. Catal.*, 2016, 358, 3313-3318.

[3] A. Seral-Ascaso, A. Luquin, M. J. Lázaro, G. F. de la Fuente, M. Laguna and E. Muoz, *Appl. Catal. A: General*, 2013, 456, 88-95.

[4] J. Zhao, Z. F. Zheng, S. Bottle, A. Chou, S. Sarina and H. Y. Zhu, *Chem. Commun.*, 2013, 49, 2676-2678.

[5] A. Corma, P. Concepción, I. Domínguez, V. Fornés and M. J. Sabater, *J. Catal.*, 2007, 251, 39-47.

[6] E. Peiris, S. Sarina, E. R. Waclawik, G. A. Ayoko, P. F. Han, J. F. Jia and H. Y. Zhu, *Angew. Chem. Int. Ed.*, 2019, 131, 12160-12164.

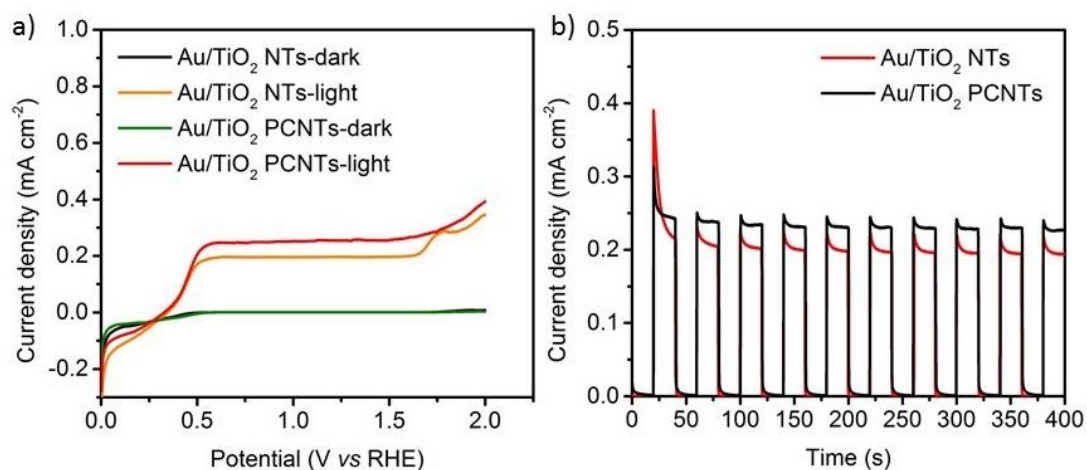

**Fig. S9** a) The LSV and b) I-t curves at 1.23 V vs. RHE for Au/TiO<sub>2</sub> NTs and Au/TiO<sub>2</sub> PCNTs under light and in the dark. The test was conducted in 1.0 M KOH aqueous solution, Xe lamp with light filter (> 400 nm).

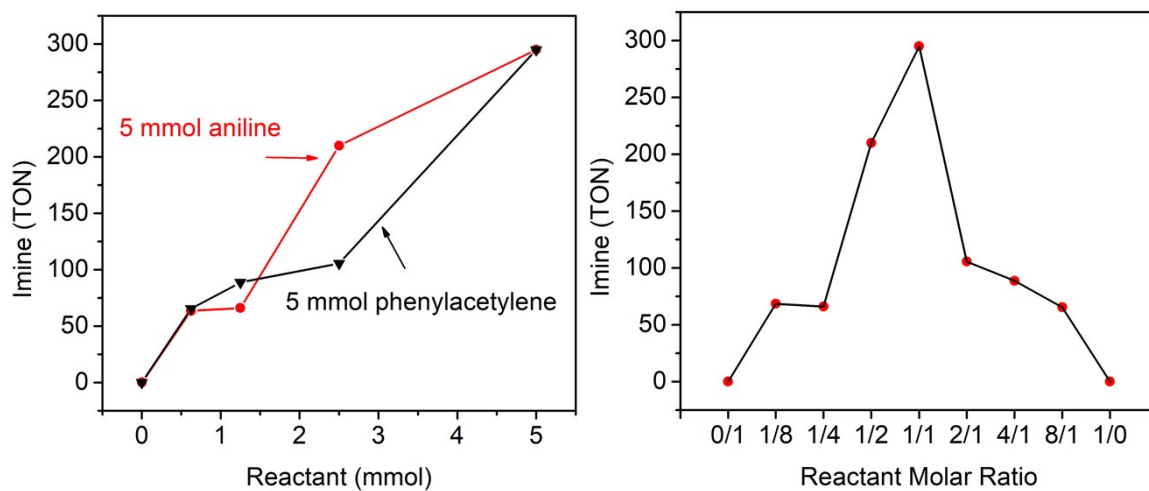

**Fig. S10** The influence of reactant molar ratio on the imine yield (TON) for Au/TiO<sub>2</sub> PCNTs.
